# Supplementary material for: Rapid diagnosis of Leishmania infection with a portable loop-mediated isothermal amplification device
Source: Springer Nature journal article supplement (doi:10.1007/s12038-021-00211-0), 2021-09-23
Supplement: MOESM6 [file 12038_2021_211_MOESM6_ESM.pdf]

**Supplementary table 1.** Comparison of ITS-1 PCR and LAMP assay results of NEC samples.

The number of parasites was extrapolated from the PCR standard curve and parasite load stated as the number per  $\mu\text{g}$  genomic DNA. Mean ADC values of ten replicates are shown.

| Sample No. | Sample code | ITS-1 PCR result | Parasite load  | LAMP assay result | Mean ADC value |
|------------|-------------|------------------|----------------|-------------------|----------------|
| 1.         | PG 11       | Negative         | Not applicable | Negative          | 3              |
| 2.         | PG 12       | Negative         | Not applicable | Negative          | 4              |
| 3.         | PG 13       | Negative         | Not applicable | Negative          | 3              |
| 4.         | PG 14       | Negative         | Not applicable | Negative          | 4              |
| 5.         | PG 15       | Negative         | Not applicable | Negative          | 5              |
| 6.         | PG 61       | Negative         | Not applicable | Negative          | 6              |
| 7.         | PG 62       | Negative         | Not applicable | Negative          | 4              |
| 8.         | PG 63       | Negative         | Not applicable | Negative          | 5              |
| 9.         | PG 64       | Negative         | Not applicable | Negative          | 5              |
| 10.        | PG 65       | Negative         | Not applicable | Negative          | 5              |
| 11.        | PG 66       | Negative         | Not applicable | Negative          | 5              |
| 12.        | PG 67       | Negative         | Not applicable | Negative          | 6              |
| 13.        | PG 68       | Negative         | Not applicable | Negative          | 5              |
| 14.        | PG 69       | Negative         | Not applicable | Negative          | 7              |
| 15.        | PG 70       | Negative         | Not applicable | Negative          | 5              |

**Supplementary table 2.** Comparison of ITS-1 PCR and LAMP assay results of leprosy patient samples.

The number of parasites was extrapolated from the PCR standard curve and parasite load stated as the number per  $\mu\text{g}$  genomic DNA. Mean ADC values of ten replicates are shown.

| Sample No. | Sample code | ITS-1 PCR result | Parasite load  | LAMP assay result | Mean ADC value |
|------------|-------------|------------------|----------------|-------------------|----------------|
| 1.         | PG 71       | Negative         | Not applicable | Negative          | 6              |
| 2.         | PG 72       | Negative         | Not applicable | Negative          | 6              |
| 3.         | PG 73       | Negative         | Not applicable | Negative          | 5              |
| 4.         | PG 74       | Negative         | Not applicable | Negative          | 5              |
| 5.         | PG 75       | Negative         | Not applicable | Negative          | 6              |
| 6.         | PG 76       | Negative         | Not applicable | Negative          | 5              |
| 7.         | PG 77       | Negative         | Not applicable | Negative          | 5              |
| 8.         | PG 78       | Negative         | Not applicable | Negative          | 5              |
| 9.         | PG 79       | Negative         | Not applicable | Negative          | 5              |
| 10.        | PG 80       | Negative         | Not applicable | Positive          | 13             |

**Supplementary table 3.** Comparison of ITS-1 PCR and LAMP assay results of post-treatment VL samples.

The number of parasites was extrapolated from the PCR standard curve and parasite load stated as the number per  $\mu\text{g}$  genomic DNA. Mean ADC values of ten replicates are shown.

| Sample No. | Sample code | ITS-1 PCR result | Parasite load | LAMP assay result | Mean ADC value |
|------------|-------------|------------------|---------------|-------------------|----------------|
| 1          | PG 96       | Negative         | Not Detected  | Negative          | 6              |
| 2          | PG 97       | Negative         | Not Detected  | Negative          | 5              |
| 3          | PG 98       | Negative         | Not Detected  | Negative          | 6              |
| 4          | PG 99       | Negative         | Not Detected  | Negative          | 5              |
| 5          | PG 100      | Negative         | Not Detected  | Negative          | 5              |
